# Supplementary material for: Long-Term Persistence of Spike Protein Antibody and Predictive Modeling of Antibody Dynamics After Infection With Severe Acute Respiratory Syndrome Coronavirus 2
Source: PubMed Central journal article supplement (PMC8994590; doi:10.1093/cid/ciab607), 2021-07-04

# CoV-2-S Gamma-plateau model

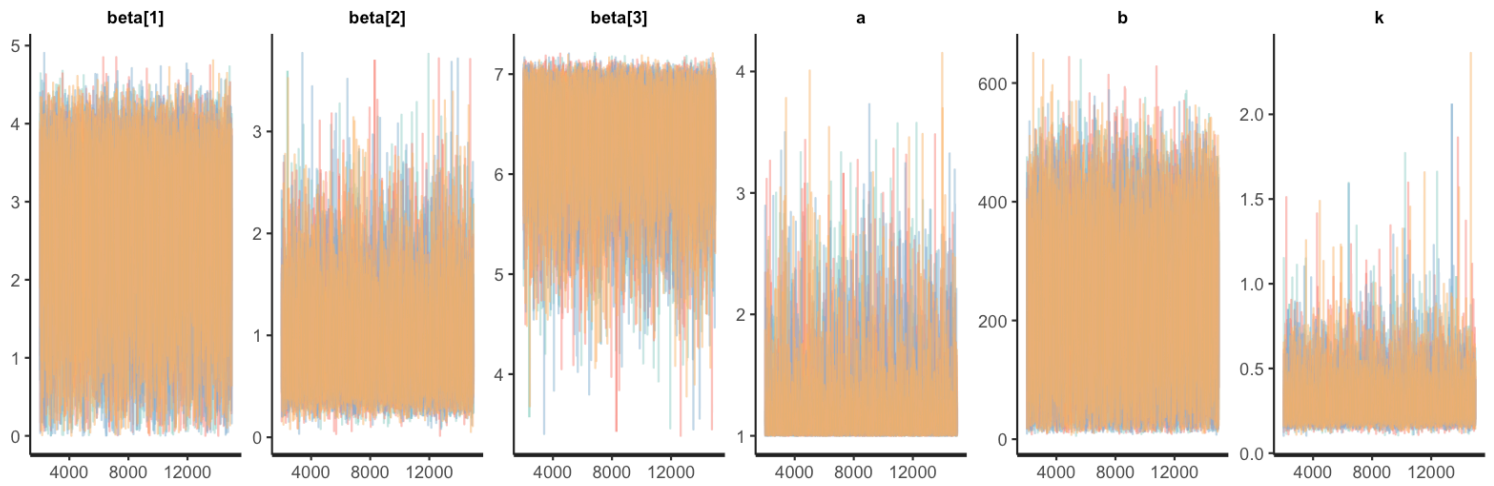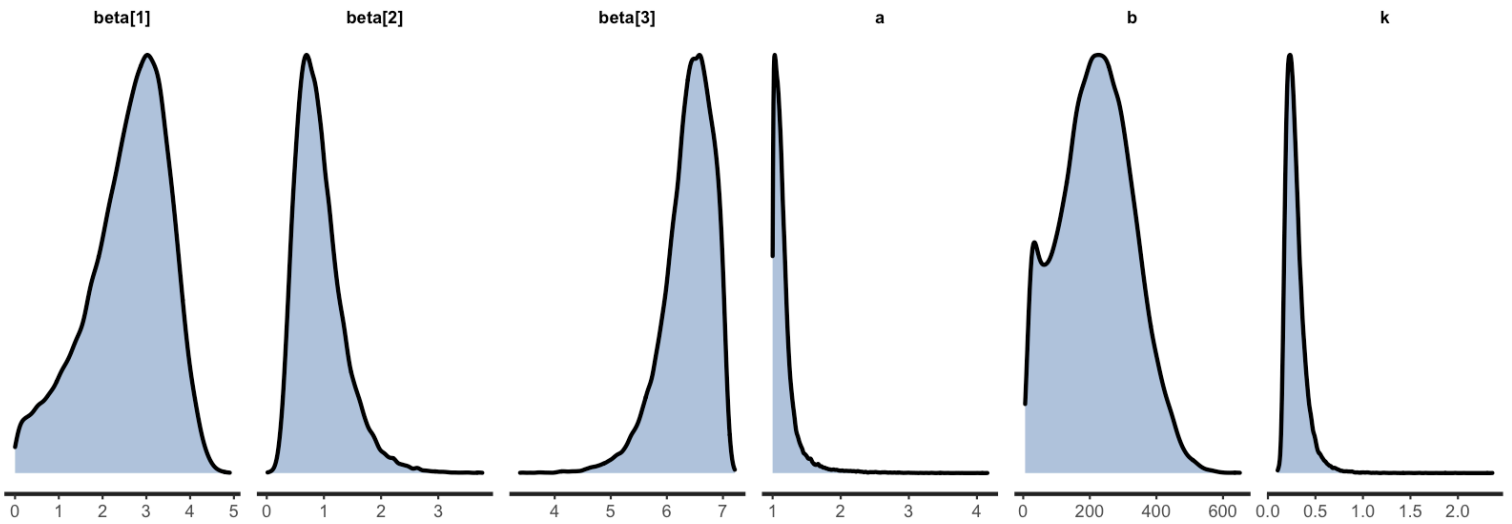

# CoV-2-RBD Gamma-plateau model

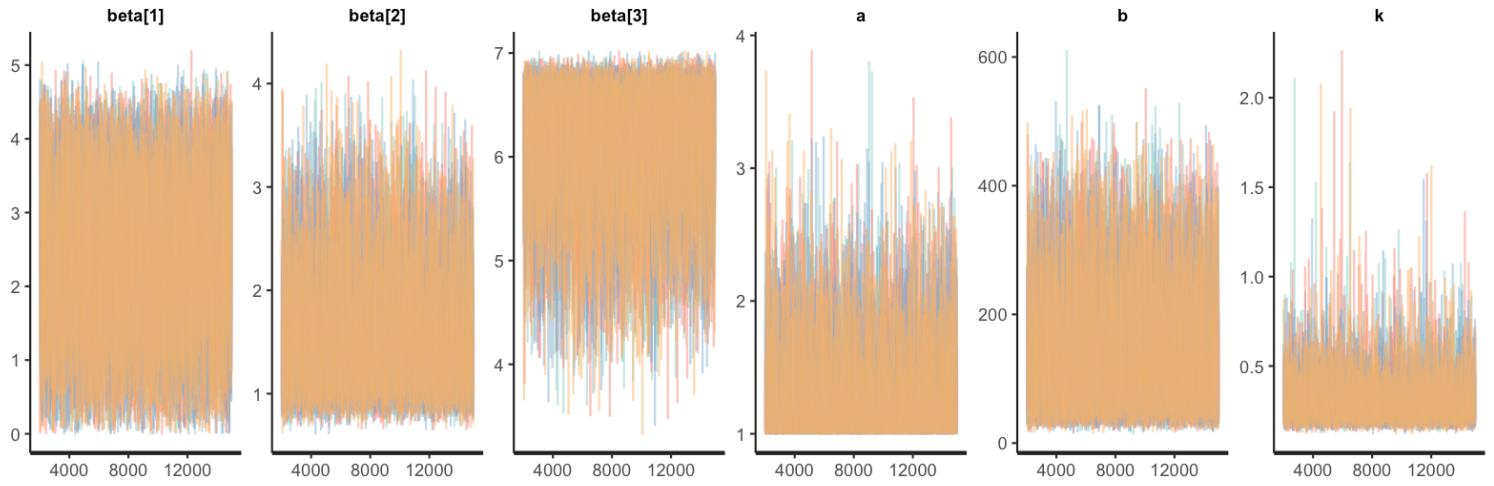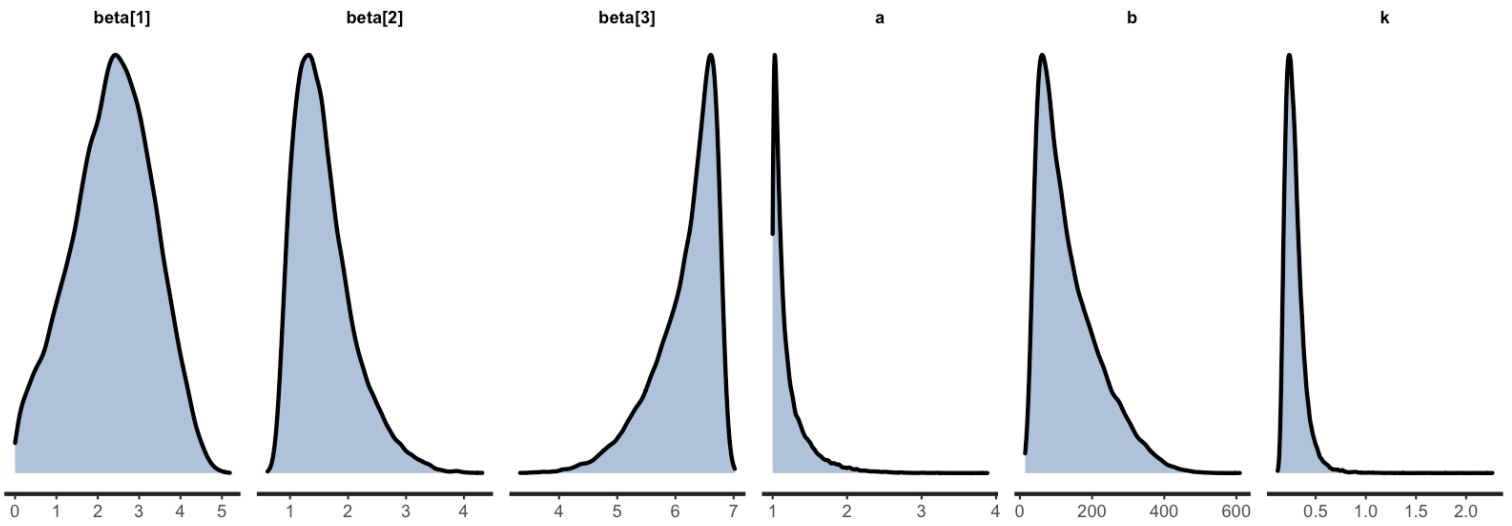

# CoV-2-N Gamma-plateau model

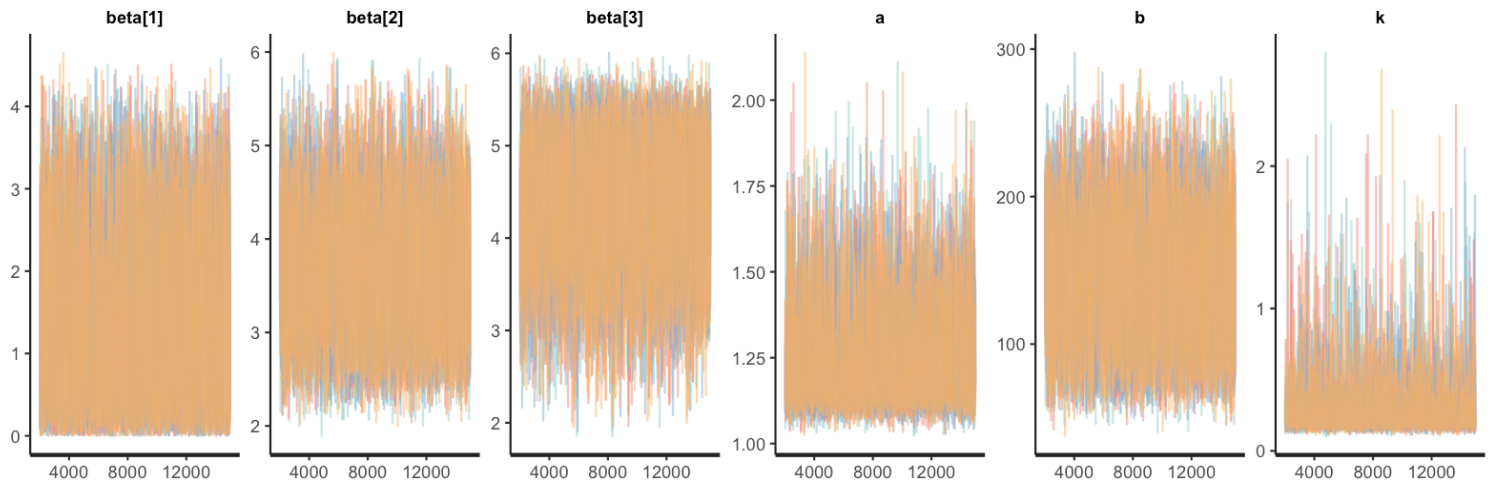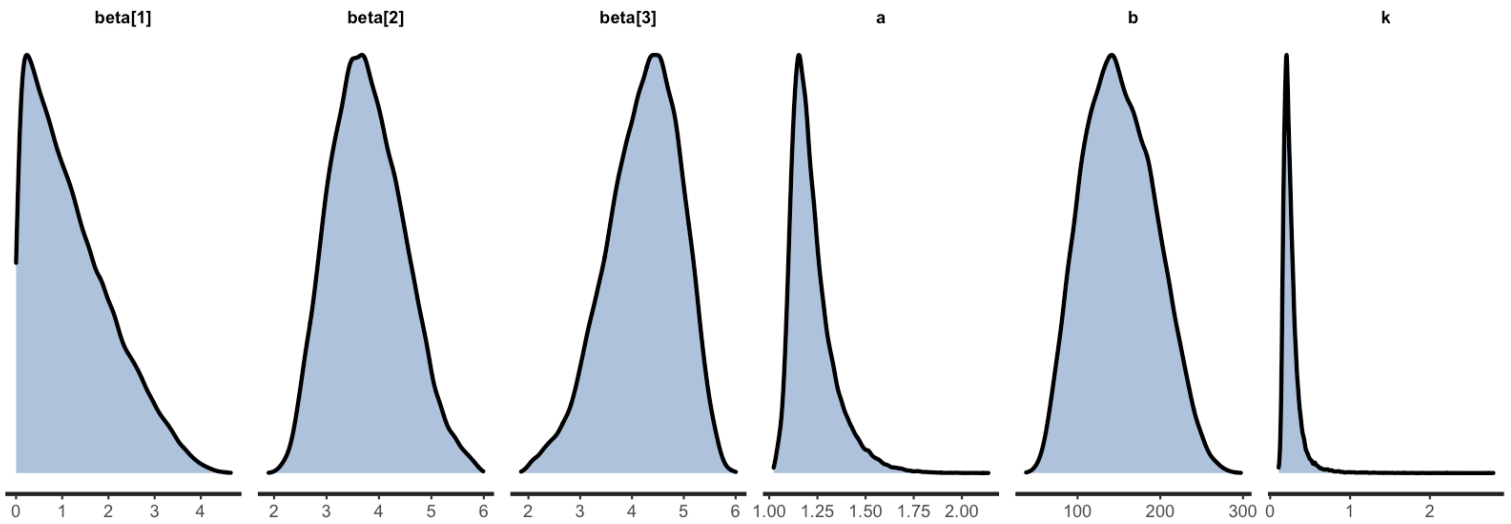

# CoV-2-S Gamma-decay model

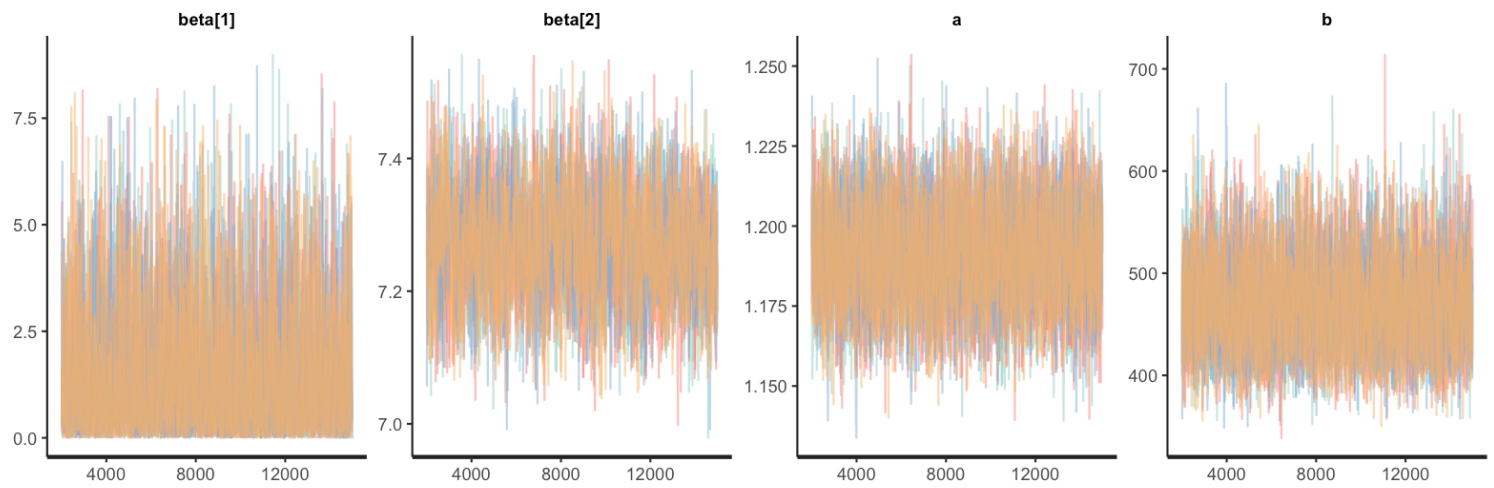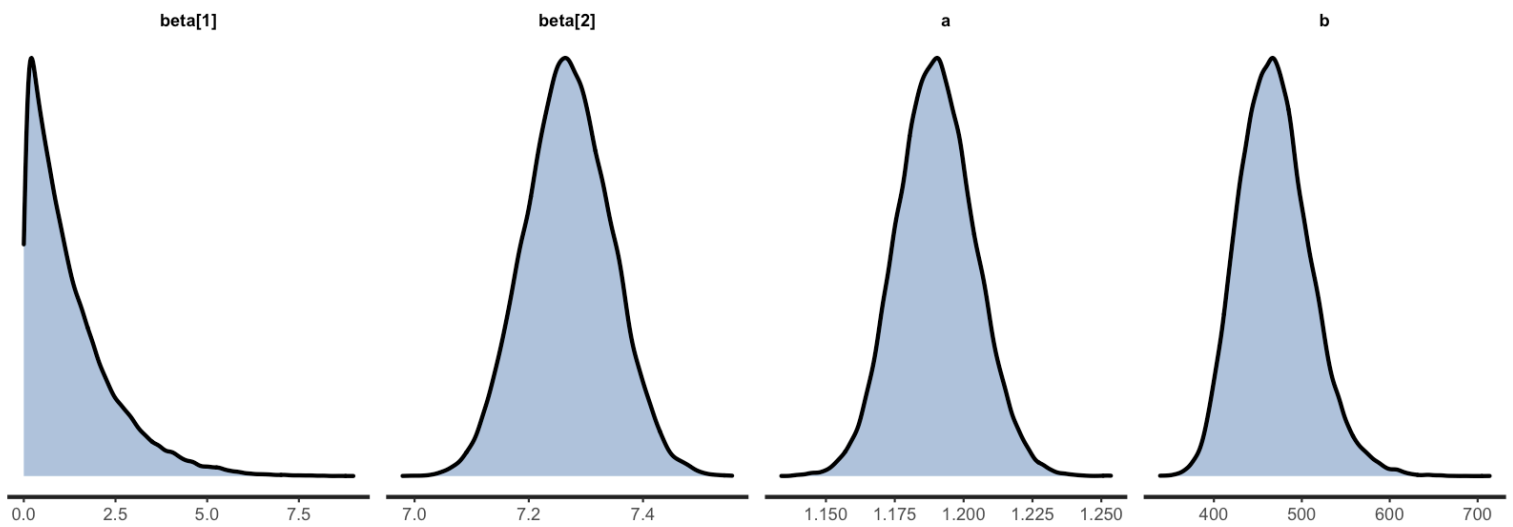

# CoV-2-RBD Gamma-decay model

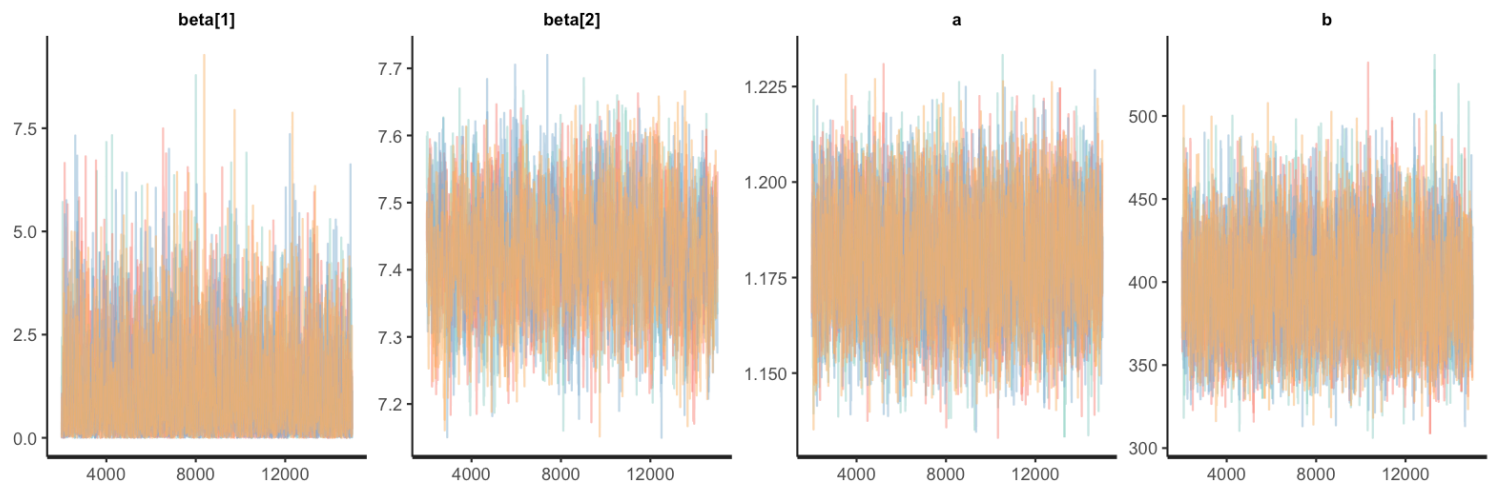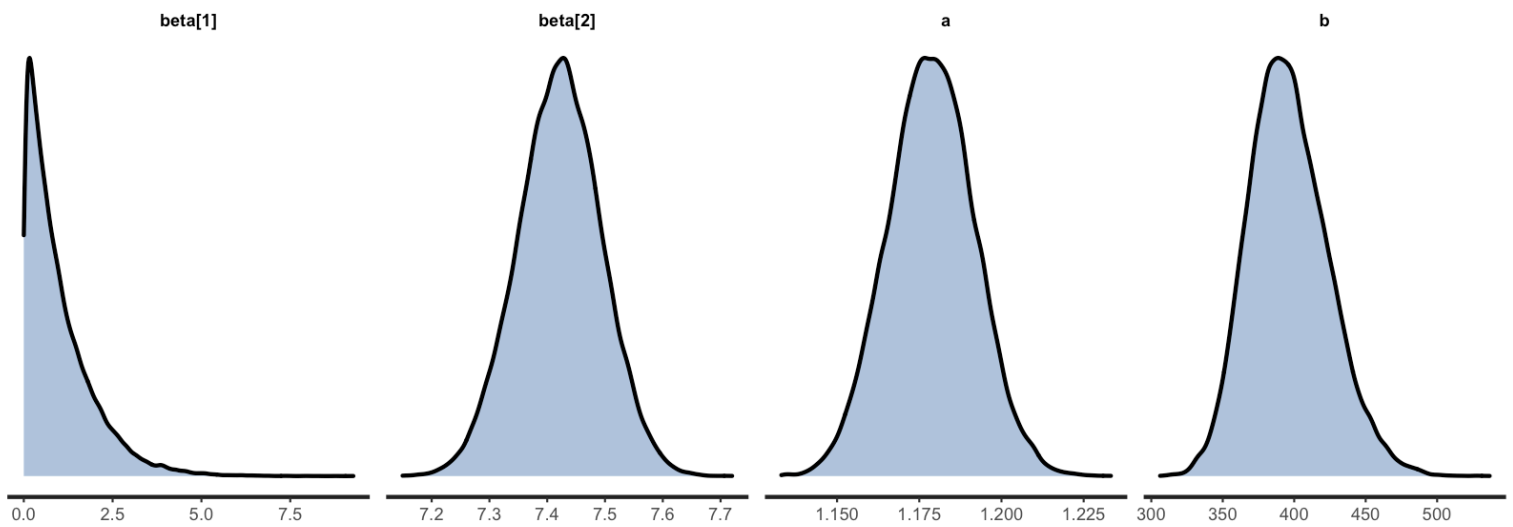

# CoV-2-N Gamma-decay model

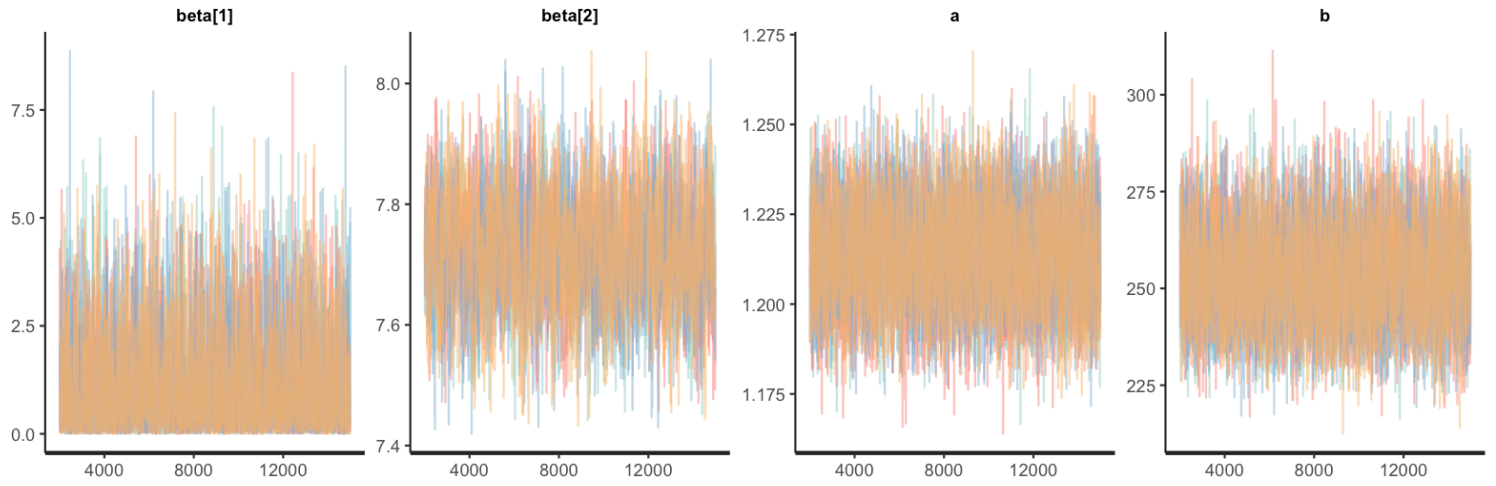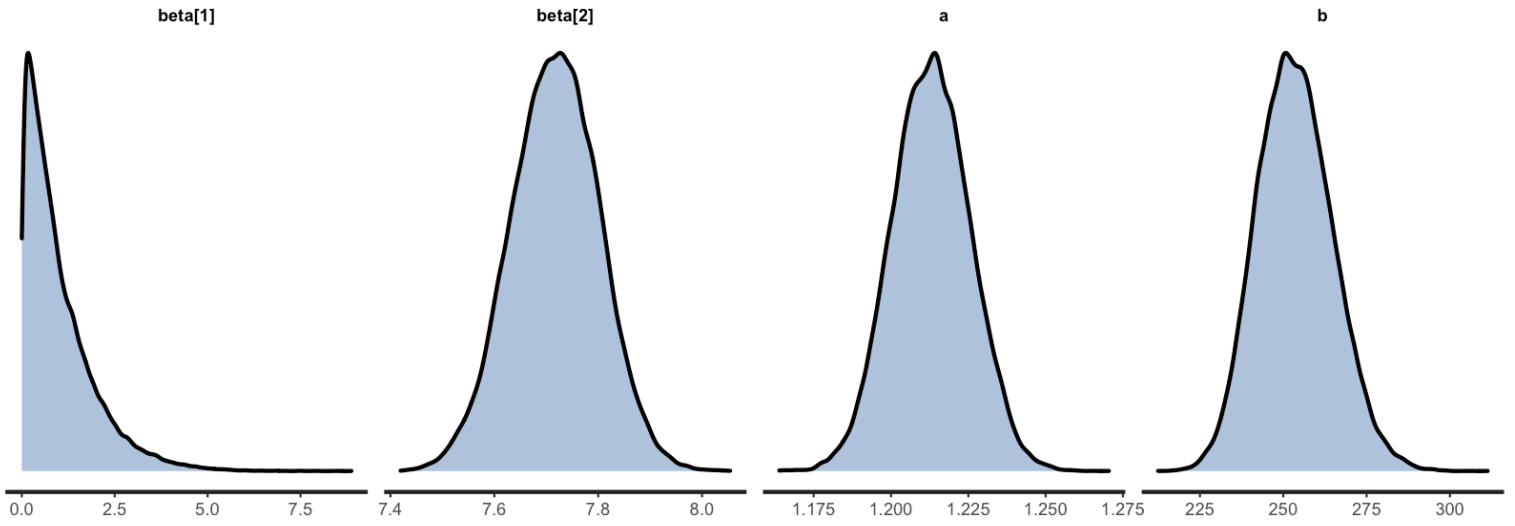

# CoV-2-S Sigmoid model

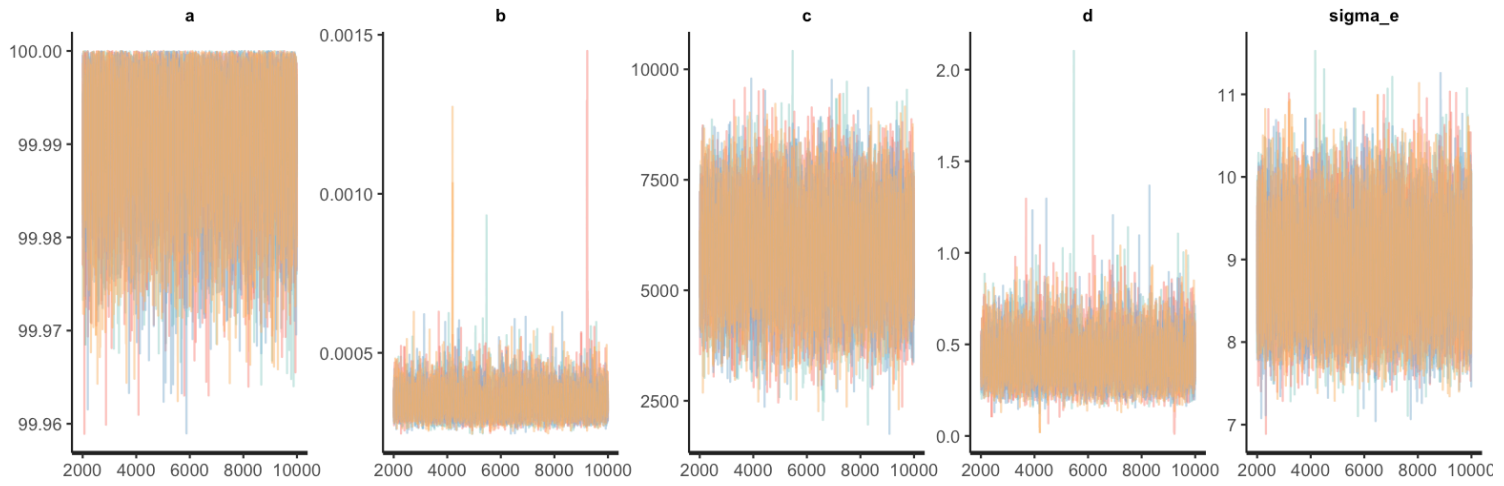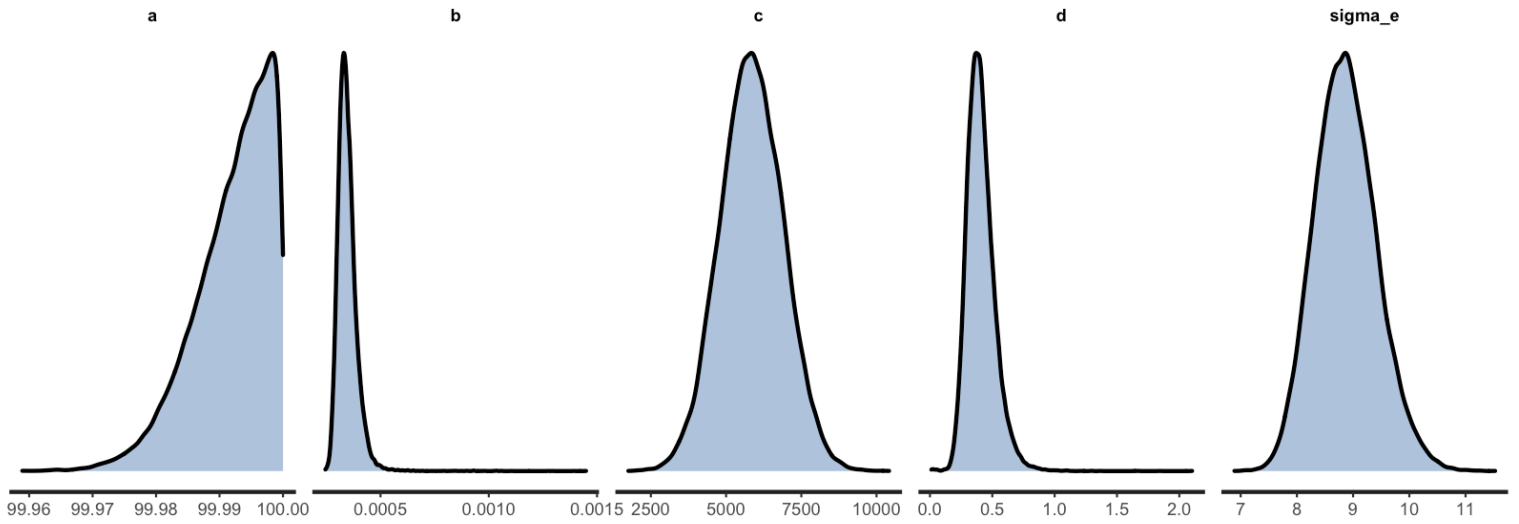

# CoV-2-RBD Sigmoid model

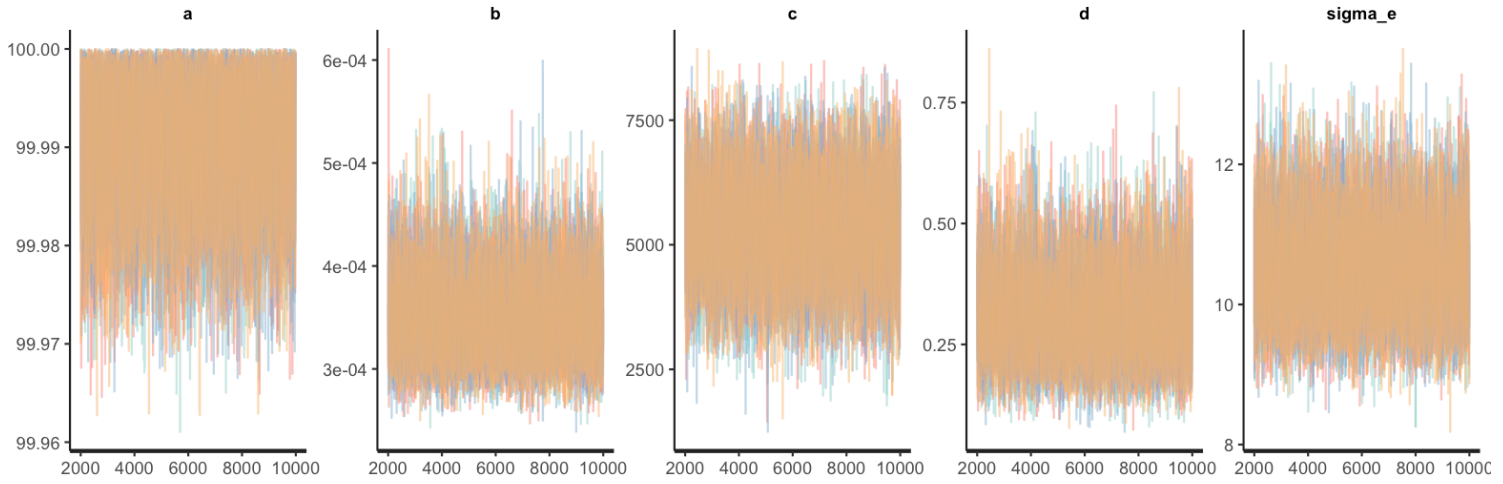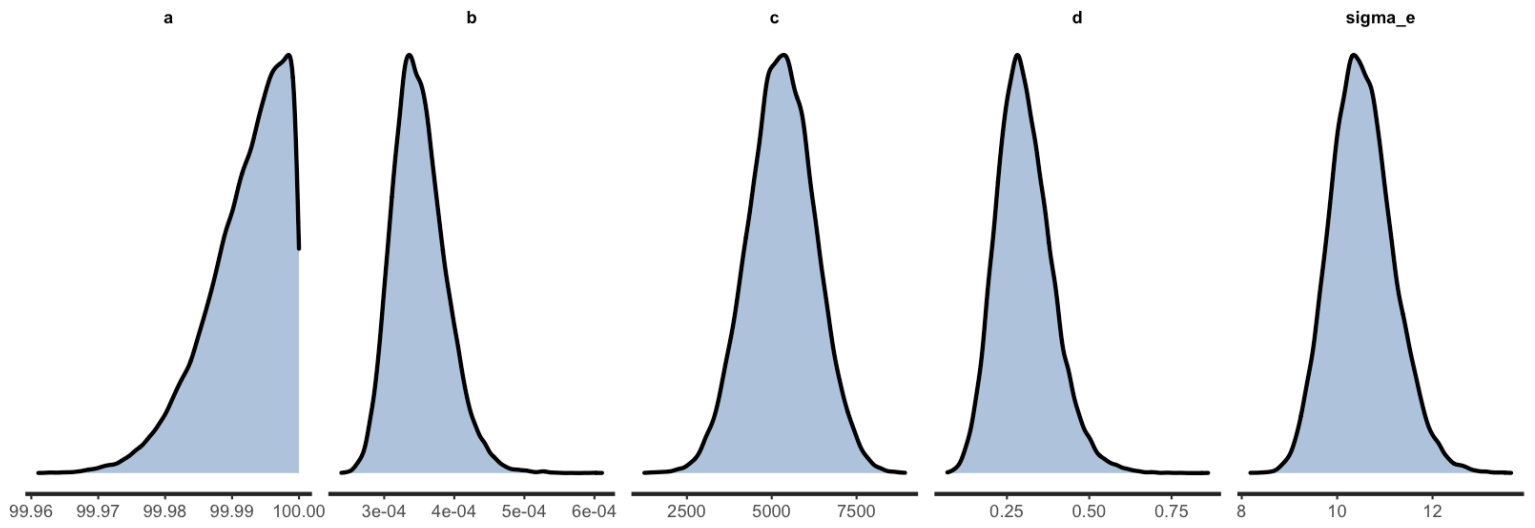

Supplement: ciab607_suppl_supplementary_figures.pdf [file ciab607_suppl_supplementary_figures.pdf]
